# Supplementary material
Source: MDPI journal article supplement (https://www.mdpi.com/2073-8994/14/3/616)
Supplement: s1 [file s1]

# Structural characterization of mono- and dimethylphosphatidylethanolamines from various organisms using a complex analytical strategy including chiral chromatography

Tomáš Řezanka<sup>1</sup>, Andrea Palyzová<sup>1</sup>, Milada Vítová<sup>2</sup>, Tomáš Brányík<sup>3</sup>, Markéta Kulišová<sup>4</sup>, Irena Kolouchová<sup>4,\*</sup>

<sup>1</sup> Institute of Microbiology of the Czech Academy of Sciences, Vídeňská 1083, 142 20 Prague, Czech Republic; rezanka@mbu.cas.cz (T.Ř.); palyzova@biomed.cas.cz (A.P.)

<sup>2</sup> Institute of Microbiology of the Czech Academy of Sciences, Centre Algtech, Laboratory of Cell Cycles of Algae, Novohradská 237, 379 81 Třeboň, Czech Republic; vitova@alga.cz (M.V.)

<sup>3</sup> Research Institute of Brewing and Malting, Lipová 511/15, 120 44 Prague, Czech Republic; branyik@beerresearch.cz (T.B.)

<sup>4</sup> Department of Biotechnology, University of Chemistry and Technology, Prague, Technická 5, 166 28 Prague, Czech Republic; marketa.kulisova@vscht.cz (M.K.); irena.kolouchova@vscht.cz (I.K.)

\* Correspondence: irena.kolouchova@vscht.cz

## 1. Supplementary Data

### Materials and Methods

#### Chemicals and standards

Phospholipase C from *Bacillus cereus* ( $\geq 200$  units/mg protein), preparative TLC Glass Plates L  $\times$  W 20 cm  $\times$  20 cm, silica gel 60 matrix with polymeric binder and fluorescent indicator, O-16:0/18:1-PC, 1-O-hexadecyl-2-oleoyl-sn-glycero-3-phosphocholine (878112P-5mg), O-16:0/18:1-PE, 1-O-hexadecyl-2-oleoyl-sn-glycero-3-phosphoethanolamine (878130C-5mg), O-16:0/O-16:0-PC, 1,2-di-O-hexadecyl-sn-glycero-3-phosphocholine (999992P-10mg), P-18:0/18:1-PC, 1-O-1'-(Z)-octadecenyl-2-oleoyl-sn-glycero-3-phosphocholine (852467C-5mg), P-18:0/18:1-PE, 1-O-1'-(Z)-octadecenyl-2-oleoyl-sn-glycero-3-phosphoethanolamine (852758P-5mg), P-18:0/18:1-PC, 1-O-1'-(Z)-octadecenyl-2-oleoyl-sn-glycero-3-phosphocholine (852467C-5mg), 16:0/18:1-PC, 1-palmitoyl-2-oleoyl-sn-glycero-3-phosphatidylcholine (850457C-25mg), 16:0/18:1-PE, 1-palmitoyl-2-oleoyl-sn-glycero-3-phosphoethanolamine (850757P-25mg), 3-palmitoyl-2-oleoyl-sn-glycero-1-phosphocholine (850855C-5mg), 16:0/16:0-DMPE, 1,2-dipalmitoyl-sn-glycero-3-phosphoethanolamine-N,N-dimethyl (850854P-25mg), 16:0/16:0-MMPE, 1,2-dipalmitoyl-sn-glycero-3-phosphoethanolamine-N-methyl (850851P-25mg), 1-hydroxy-2-oleoyl-sn-glycero-3-phosphocholine (855773C-1mg), 16:0/18:1-PI, 1-palmitoyl-2-oleoyl-sn-glycero-3-phosphoinositol (ammonium salt) (850142P-500 $\mu$ g), P-16-LPC, 1-O-1'-(Z)-hexadecenyl-sn-glycero-3-phosphocholine (852464P-10mg), commercial bacterial FAMES standard solution (BAME), PUFA No.1 Marine source, PUFA No.2 (Animal Source), PUFA No.3 from Menhaden Oil, analytical standards and all other reagents used were of analytical grade were purchased from Merck (previously Sigma-Aldrich and/or Supelco, Prague, Czech Republic).

#### Cultivation

The anaerobic beer spoiling bacteria *Megasphaera cerevisiae* (DSM 20461) and *Pectinatus frisingensis* (DSM 20465) used in this study were obtained from the German collection

Citation: Řezanka, T.; Palyzová, A.; Vítová, M.; Brányík, T.; Kulišová, M.; Kolouchová, I. Structural characterization of mono- and dimethylphosphatidylethanolamines from various organisms using a complex analytical strategy including chiral chromatography. *Symmetry* **2022**, *14*, 616.

<https://doi.org/10.3390/sym14030616>

Academic Editor: Dimitrios Vlachakis

Received: 21 February 2022

Accepted: 15 March 2022

Published: 19 March 2022

Publisher's Note: MDPI stays neutral with regard to jurisdictional claims in published maps and institutional affiliations.

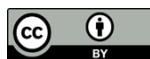

Copyright: © 2022 by the authors. Submitted for possible open access publication under the terms and conditions of the Creative Commons Attribution (CC BY) license (<https://creativecommons.org/licenses/by/4.0/>).

of microorganisms and cell cultures (DSMZ, Braunschweig, Germany). All microorganisms were cultivated in 52.2 g/L MRS broth medium (Merck, Darmstadt, Germany) with a typical composition (g/L): peptone from casein 10.0, meat extract 8.0, yeast extract 4.0, D(+)-glucose 20.0, di-potassium hydrogen phosphate 2.0, Tween 80 1.0, di-ammonium hydrogen citrate 2.0, sodium acetate 5.0, magnesium sulfate 0.2, manganese sulfate 0.04. The MRS broth was further supplemented with (g/L) (R)-(+)-Cysteine hydrochloride hydrate 0.25 and sodium thioglycolate 0.25. The first cultivation was carried out in a microbiology test tube (5 mL), while the subsequent cultures were in unshaken flasks with increasing volumes 50, 250 and 800 mL. Each subsequent culture was inoculated with the sedimented biomass of the previous one. All cultivations were carried out in an anaerobic incubator (30 °C, 72 hours, N<sub>2</sub> atmosphere).

The unicellular red alga *Galdieria sulphuraria* (Galdieri) Merola ACUF 002 (Algal Collection of Dipartimento delle Scienze Biologiche, Section of Plant Biology, University “Federico II” of Naples, Italy) and the green alga *Desmodesmus quadricauda* (Turpin) Brébisson CCALA 463 (previously *Scenedesmus quadricauda*, strain Greifswald/15) from the Culture Collection of Autotrophic Organisms, Institute of Botany of the Czech Academy of Sciences, Třeboň, Czech Republic, were grown in glass cylinder photobioreactors (200 mL). The photobioreactors were placed in a thermostatic unit and illuminated by a panel of dimmable fluorescent lamps (OSRAM DULUX L55 W/950 Daylight, Milano, Italy). The algal cultures in the photobioreactors were supplied with a mixture of air and CO<sub>2</sub> gas (2% v/v), at a flow rate of 15 L h<sup>-1</sup>. The experiments were carried out in a batch culture regime, at temperatures of 30 °C and 40 °C for *D. quadricauda* and *G. sulphuraria*, respectively and incident light intensity of 500 μmol photons m<sup>-2</sup> s<sup>-1</sup>. *G. sulphuraria* was grown in modified Galdieria-nutrient medium pH 3 [1] and *D. quadricauda* was grown in SS-medium pH 7 [2]. The biomass was harvested by centrifugation (ROTINA 380R, HETTICH, Tuttlingen, Germany) at 5000 rpm for 10 min, frozen at -80 °C and then freeze dried (CoolSafe 95-15Pro, Labogene, Lillerød, Denmark).

The mold *Aspergillus niger* 629 CCF was obtained from the Culture Collection of Fungi, Faculty of Science, Charles University in Prague, and maintained on yeast medium slants (0.3% malt extract, 0.3% yeast extract, 0.5% peptone, and 0.5% glucose) at 4 °C. Production of conidia by the fungal strain was performed on yeast medium plates at 30 °C for 7 days until fully conidiated. For analysis of lipids, the fungal strain was grown in minimal medium (in g/L: NaCl 0.1, K<sub>2</sub>HPO<sub>4</sub> 1.03, KH<sub>2</sub>PO<sub>4</sub> 0.75, and NH<sub>4</sub>Cl 1.0) containing 0.5% glucose as the carbon source and trace elements (in mg/L: MgSO<sub>4</sub> × 7H<sub>2</sub>O 200, CaCl<sub>2</sub> × 2H<sub>2</sub>O 10, FeSO<sub>4</sub> × 7H<sub>2</sub>O 1.5). The culture was inoculated with conidia (10<sup>6</sup>/mL) and incubated at 28 °C and 150 rpm for three days.

#### *Fatty acid methyl esters (FAME) and dimethylacetals (DMA) analysis*

Fatty acids and fatty aldehydes were released from total lipids according to the previously published paper [3]. Briefly, the total lipids were treated with acid (2 M HCl, 100 °C, 2.5 h), extracted with hexane and methylated with 10 % (w/v) methanolic BF<sub>3</sub>, (80 °C, 10 min). GC-MS of FAME and DMA mixtures were carried out on a Finnigan 1020 B in EI mode. Splitless injection was at 100 °C, and a fused silica capillary column (Supelcowax 10; 60 m × 0.25 mm i.d., 0.25 mm film thickness; Supelco, Prague) was used. The temperature program was as follows: 100 °C for 1 min, subsequently increasing at 20 °C/min to 180 °C and at 2 °C/min to 280 °C, which was maintained for 1 min. The carrier gas was helium at a linear velocity of 60 cm/s. All spectra were scanned within the range of m/z 50–500. The structures of FAMEs were confirmed by comparison of retention times and fragmentation patterns with those of the standard FAMEs (Sigma-Aldrich, Prague) [4,5].

#### *Separation FAME and DMA by TLC and reduction of DMA*

The FAME and DMA mixtures were separated on a silica gel plate (20 × 20 cm) and the elution was performed using CH<sub>2</sub>Cl<sub>2</sub> [3]. Bands (FAME R<sub>f</sub> = 0.60, DMA R<sub>f</sub> = 0.38) were visualized (UV light) by spraying with 2,7-dichlorofluorescein in methanol, scraped and extracted from silica by hexane. After evaporation of hexane in a stream of nitrogen, the DMA were acid hydrolyzed (2 M HCl, 25 °C, 2.5 h) and extracted with hexane.

#### *Reduction of aldehydes*

Alcohols were prepared according to Farquhar [6]. Briefly, the free aldehydes were dissolved in a 1 mL of anhydrous ethyl ether, cooled to -20 °C, and 3 mL of a 3% solution of LiAlH<sub>4</sub> in anhydrous ether was added with constant stirring. The reaction proceeded for 2 hours at -20 °C, a mixture of 90% methanol-water was added to decompose the excess LiAlH<sub>4</sub>, the precipitate was centrifuged, washed with ether, and evaporated to dryness under vacuum.

#### *Preparation of nicotines of long chain fatty alcohols*

N,N'-dicyclohexylcarbodiimide (5 mg) was added to a solution of a mixture of fatty alcohols (0.5 mg), nicotinic acid (2 mg) and 4-dimethylaminopyridine (0.5 mg) in dichloromethane (3 mL) at 0 °C for 5 minutes. The mixture was cooled to room temperature and then left overnight. Hexane (2 mL) was then added and the product was extracted and further analyzed by GC-MS [7].

#### *Preparation of 3-pyridylcarbonyl esters of FAs*

Transesterification of FAME into 3-pyridylcarbinol esters was performed according to Destailats and Angers [8]. Briefly, a solution of potassium tert-butoxide in THF (100 µL, 1.0 M) was added to 3-hydroxymethylpyridine (200 µL). FAME (1 mg) was added with stirring in dry dichloromethane (1 mL) and the mixture was held at 35 °C for 15 minutes. An aqueous solution of sodium bicarbonate (1 mL, 2.5%) was added and the organic phase was directly used for GC-MS.

#### *GC-MS of 3-pyridylcarbonyl ester of fatty acids and nicotines of long chain fatty alcohols*

A fatty acid 3-pyridylcarbonyl ester mixture was analyzed on the instrument described above. Injection temperature (splitless injection) was 100 °C, and an Ultra-1 capillary column (Supelco, Prague, Czech Republic) was used. The temperature program was as follows: 100 °C for 1 min, subsequently increasing at 20 °C/min to 180 °C and at 2 °C/min to 280 °C, which was maintained for 1 min. The carrier gas was helium at a linear velocity of 60 cm/s. All spectra were scanned within the range of m/z 50–500.

## 2. Supplementary Figures and Tables

### 2.1. Supplementary Figures

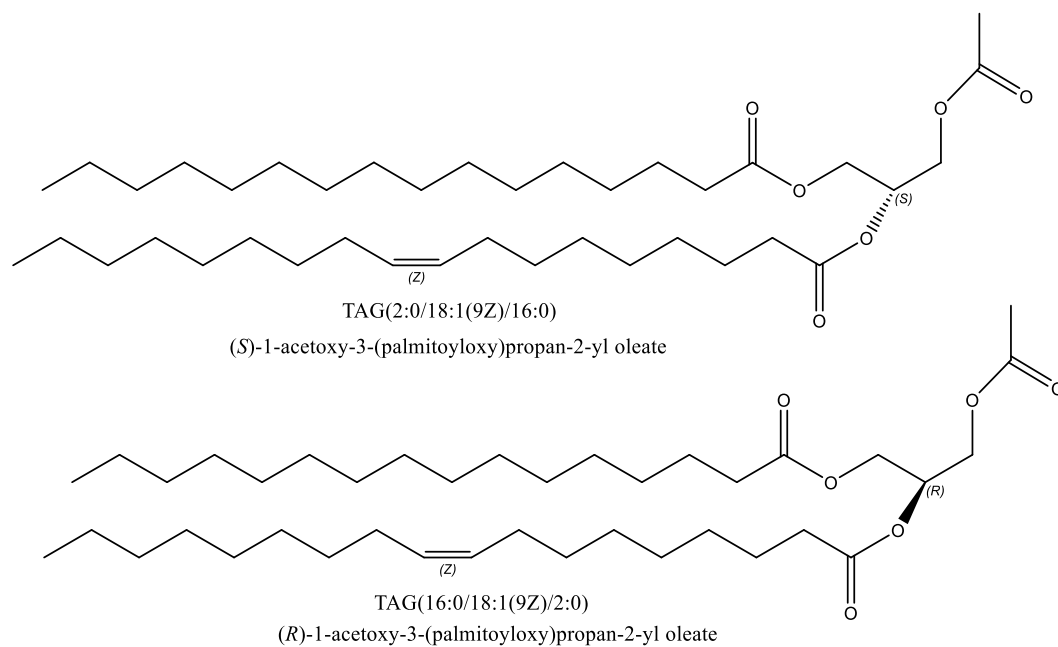

**Figure S1:** Structure of two enantiomeric TAG

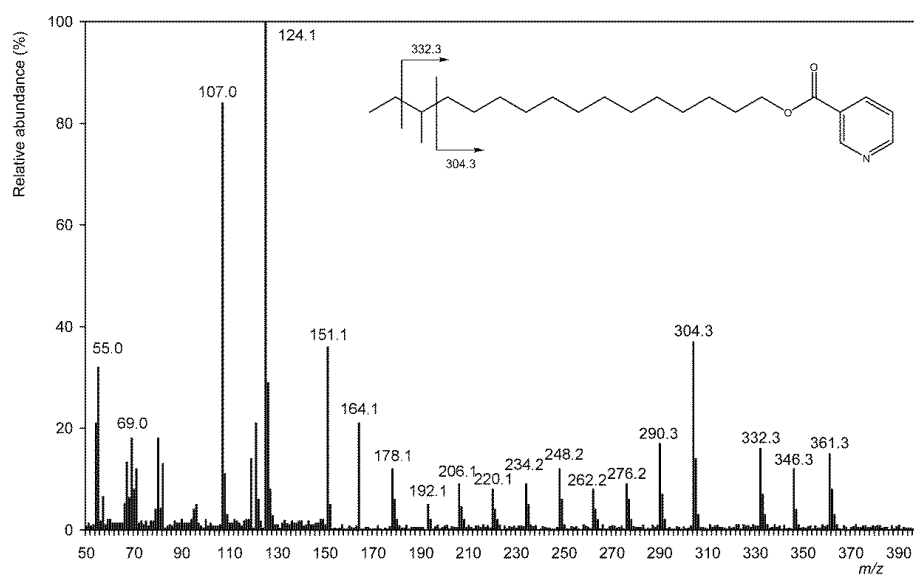

**Figure S2:** Mass spectrum of nicotinate ester of 14-methylhexadecanol

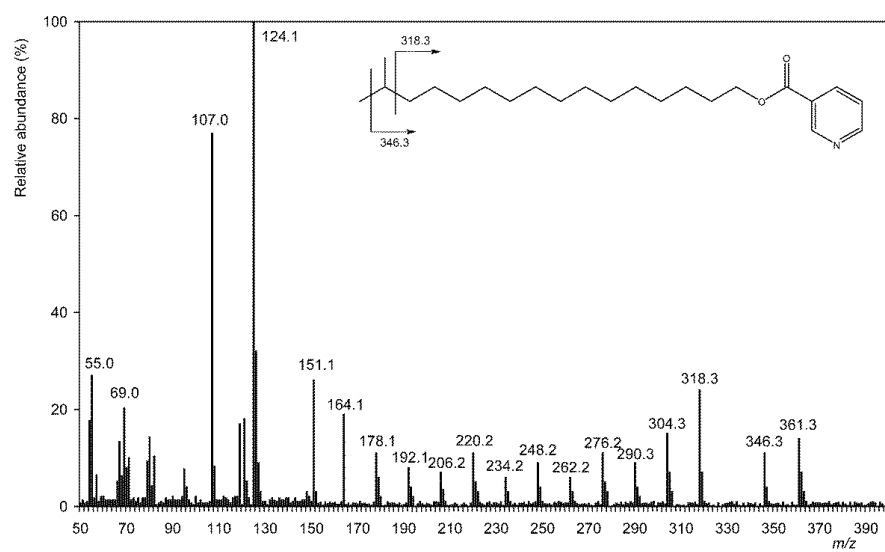

Figure S3: Mass spectrum of nicotinate ester of 15-methylhexadecanol

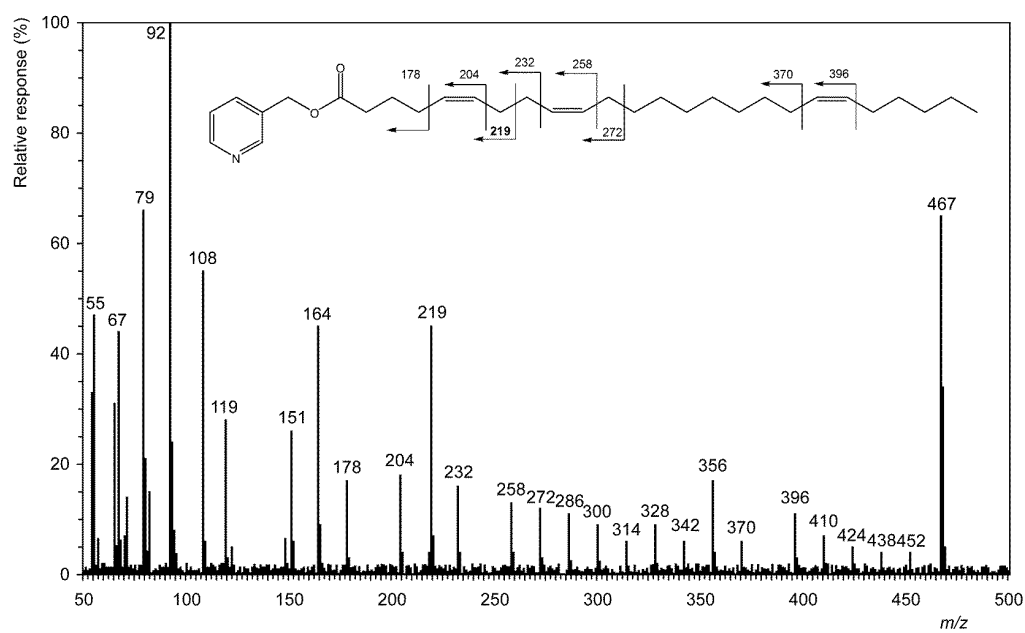

Figure S4: Mass spectrum of 3-pyridylcarbonyl 5,9,19-pentacosatrienoate

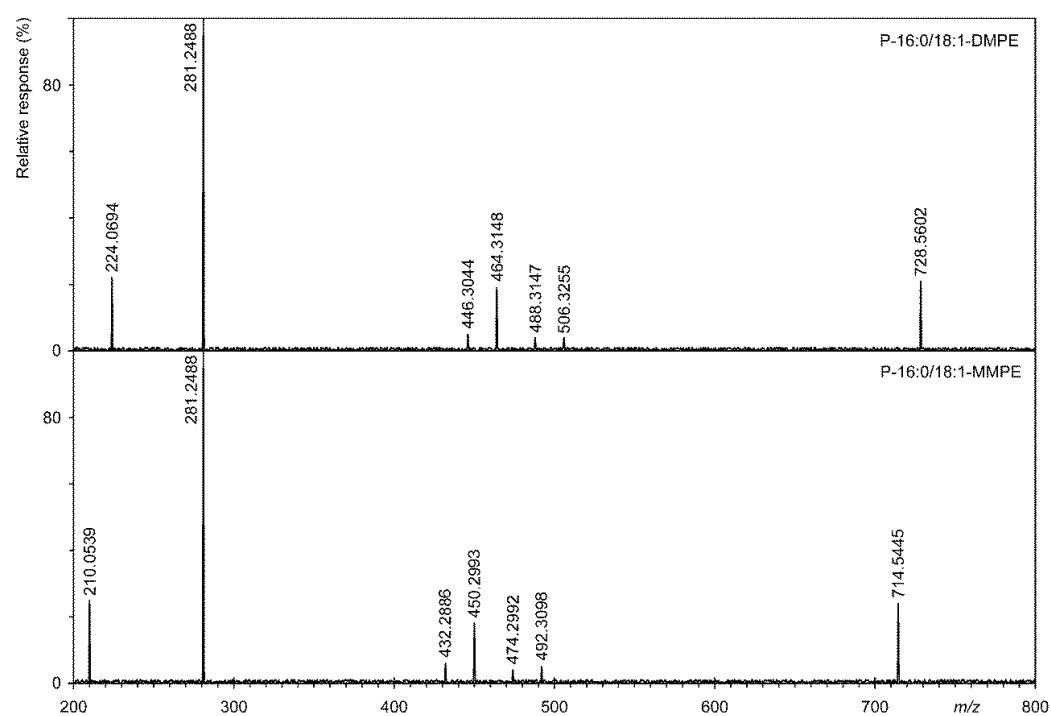

**Figure S5:** Tandem MS of ions at  $m/z$  728.5601 and 714.5443 ( $[M-H]^+$ ). Based on the  $m/z$  values for the ions, see Tables S2 and S3, P-16:0/18:1-DMPE and 714.5443 P-16:0/18:1-MMPE, the probable structures have been proposed

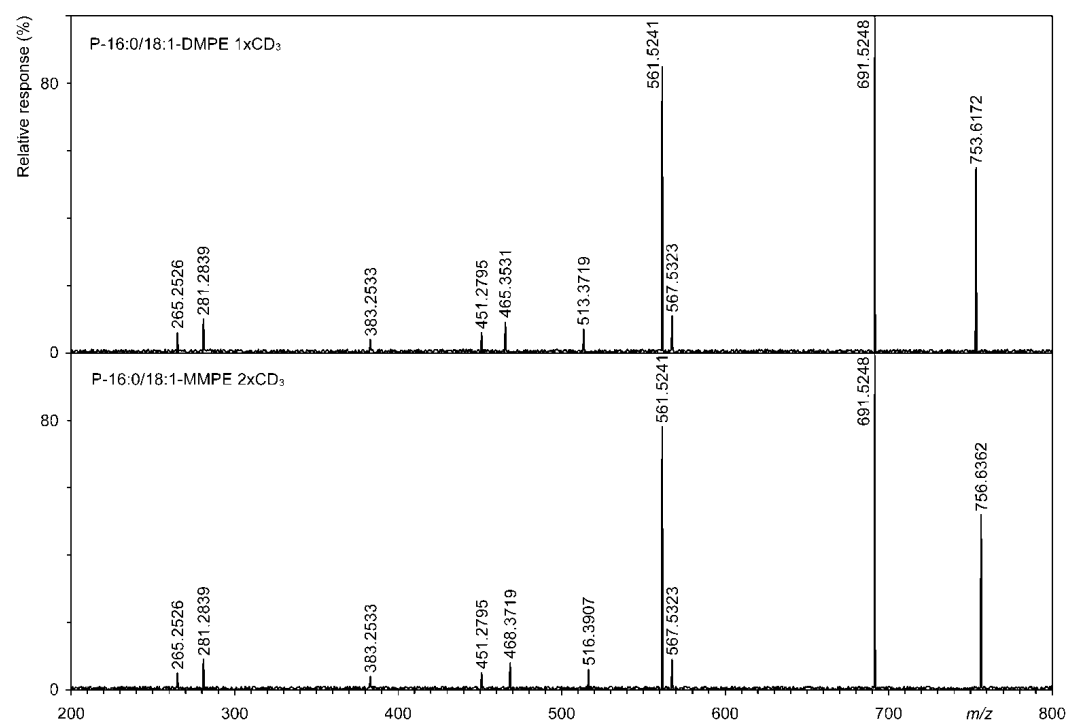

**Figure S6:** Tandem mass spectra (positive ESI) of lithium adducts of deuterium-labeled natural phospholipids; 1-alkenyl-2-acyl-PC (P-16:0/18:1-DMPE with  $1 \times CD_3$  and P-16:0/18:1-MMPE with  $2 \times CD_3$ )

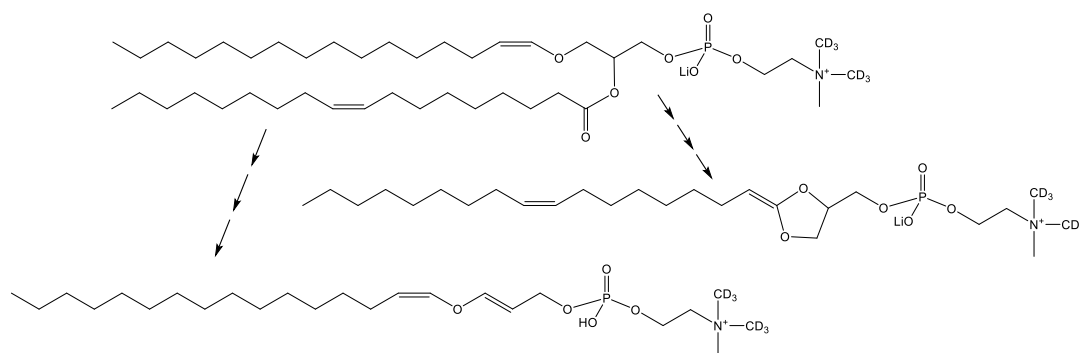

**Figure S7:** Structures of deuterated methyl-PE key ions (P-16:0/18:1-methyl-PE with  $2 \times \text{CD}_3$ ) obtained by tandem MS

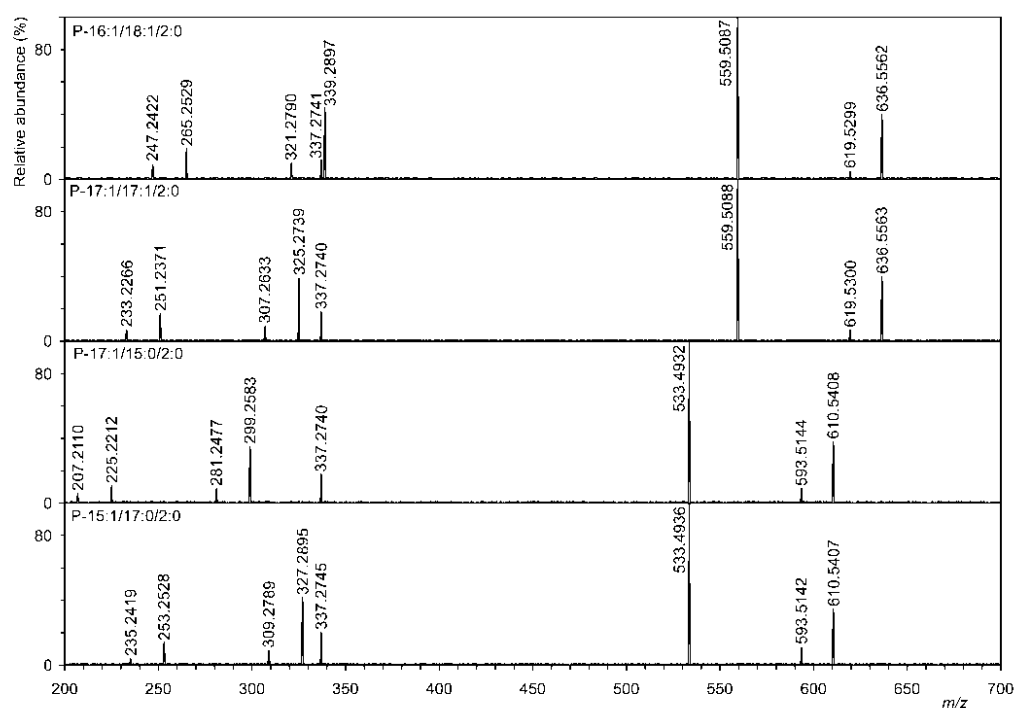

**Figure S8:** Tandem mass spectra of four AcTAG (P-16:1/18:1/2:0, P-17:1/17:1/2:0, P-17:1/15:0/2:0, P-15:1/17:0/2:0,) obtained from two beer spoilage bacteria *Pectinatus* and *Megasphaera*

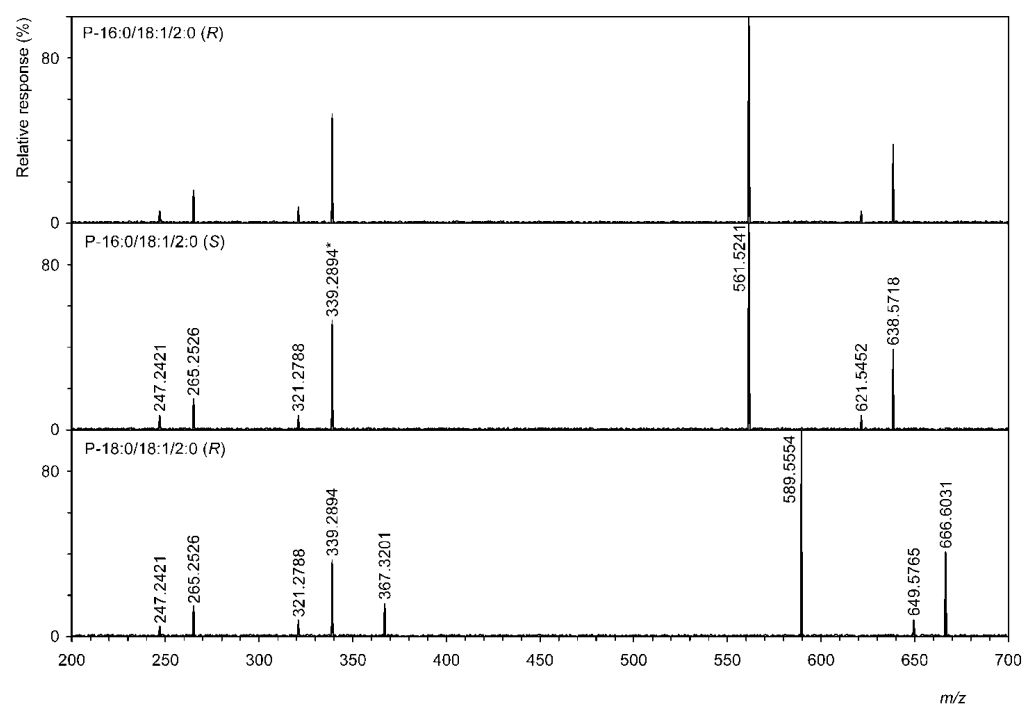

**Figure S9:** Tandem mass spectra of two enantiomers, i.e. two molecular species P-16:0/18:1/2:0 and 2:0/18:1/P-16:0, and the synthetic derivative (P-18:0/18:1/2:0)

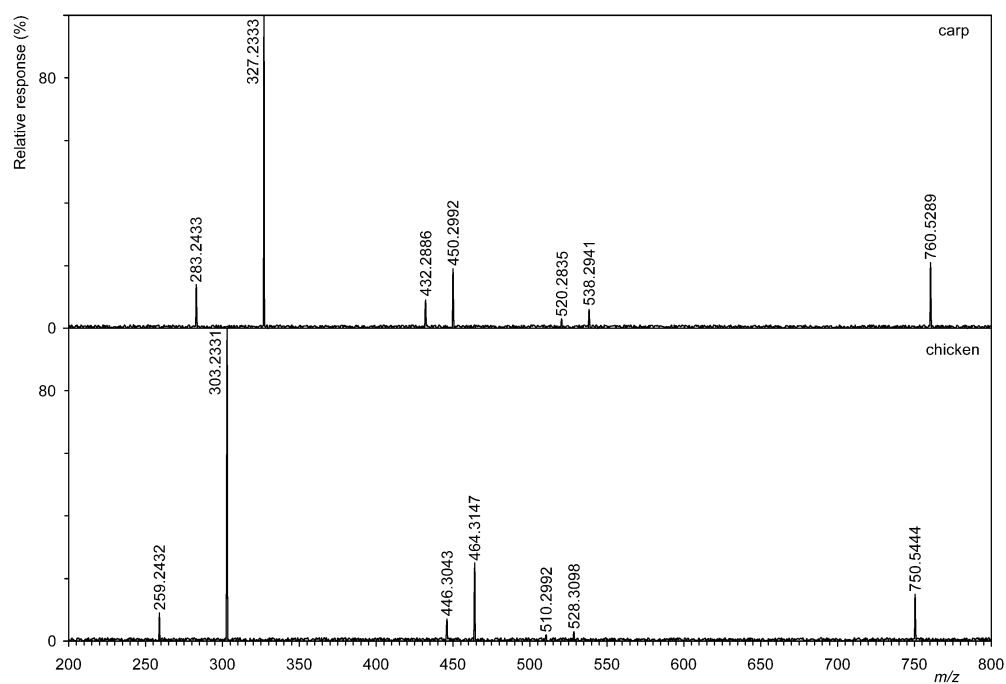

**Figure S10:** Tandem mass spectra of two molecular species, i.e. molecular species P-16:0/22:6-methyl-PE (carp) and P-16:0/20:4-dimethyl-PE (chicken).



## 2.2. Supplementary Tables

**Table S1:** Examples of organisms and their proteins involvement in lipid biosynthesis

| Organisms                               | Protein name                                                           | GenBank ID        |
|-----------------------------------------|------------------------------------------------------------------------|-------------------|
| <i>Arthrobacter sp.</i> <sup>A</sup>    | glycerol-1-phosphate dehydrogenase                                     | SDP79711.1        |
|                                         | glycerol-3-phosphate dehydrogenase                                     | KUM38942.1        |
| <i>Aspergillus niger</i>                | phosphatidyl- <i>N</i> -methylethanolamine <i>N</i> -methyltransferase | TPR01769.1        |
| Bovine heart                            | phosphatidylethanolamine <i>N</i> -methyltransferase                   | XP_027372981.1    |
| Carp                                    | phosphoethanolamine <i>N</i> -methyltransferase (predicted)            | XP_018963479.1    |
| <i>Galdieria sulphuraria</i>            | phosphatidylethanolamine <i>N</i> -methyltransferase                   | EME26291.1        |
| Chicken                                 | phosphatidylethanolamine <i>N</i> -methyltransferase                   | XP_015149665.1    |
| <i>Kocuria palustris</i>                | phosphoethanolamine <i>N</i> -methyltransferase                        | KUG54981.1        |
| <i>Kocuria rhizophila</i>               | phospholipid methyltransferase                                         | TDP57698.1        |
|                                         | glycerol-3-phosphate dehydrogenase                                     | KUP28229.1        |
| <i>Lactobacillus iners</i>              | glycerol-1-phosphate dehydrogenase                                     | PMC46187.1        |
| <i>Laetiporus fungus</i> <sup>B</sup>   | phosphatidyl- <i>N</i> -methylethanolamine <i>N</i> -methyltransferase | PCH43169.1        |
| <i>Lucifera butyrica</i> <sup>C</sup>   | <i>sn</i> -glycerol-1-phosphate dehydrogenase                          | WP_122628282.1    |
| <i>Megasphaera cerevisiae</i>           | phospholipid <i>N</i> -methyltransferase                               | SKA05810.1        |
|                                         | glycerol-3-phosphate dehydrogenase                                     | WP_048513017.1    |
| <i>Pectinatus</i>                       | SAM-dependent methyltransferase                                        | WP_132547387      |
|                                         | anaerobic glycerol-3-phosphate dehydrogenase                           | WP_132549284.1    |
|                                         | <i>sn</i> -glycerol-1-phosphate dehydrogenase                          | WP_132548237.1    |
| <i>Raoultella ornithinolytica</i>       | phospholipid <i>N</i> -methyltransferase                               | STR72523.1        |
|                                         | glycerol-3-phosphate dehydrogenase                                     | STR68378.1        |
| <i>Saccharomyces pastorianus</i>        | phosphatidylethanolamine <i>N</i> -methyltransferase                   | QID85214.1        |
| <i>Salmonella enterica</i> <sup>D</sup> | <i>sn</i> -glycerol-1-phosphate dehydrogenase                          | AVB03899.1        |
| <i>Scenedesmus</i> <sup>E</sup>         | phosphatidyl- <i>N</i> -methylethanolamine <i>N</i> -methyltransferase | JABVCE010000016.1 |
| Spinach                                 | phosphoethanolamine <i>N</i> -methyltransferase-like                   | XP_021840090.1    |
| <i>Spongilla lacustris</i> <sup>F</sup> | phosphoethanolamine <i>N</i> -methyltransferase-like                   | XP_019851130.1    |

**Color background** - protein catalyzing dehydrogenation of substrate

**Color background** - protein catalyzing transfer of methyl group

<sup>A</sup> *Arthrobacter* and also *Kocuria* belong to the same family, i.e. Micrococcaceae

<sup>B</sup> Family Polyporaceae is the same for both fungi, i.e. *Wolfiporia* and *Laetiporus*

<sup>C</sup> *Lucifera* and *Megasphaera* belongs to the same family, i.e. Veillonellaceae

<sup>D</sup> *Salmonella* and *Raoultella* belong to the same family, i.e. Enterobacteriaceae

<sup>E</sup> hypothetical protein, i.e. similar to phosphatidyl-*N*-methylethanolamine *N*-methyltransferase (*Arabidopsis thaliana*) UniProtKB/Swiss-Prot:Q9SAH5

<sup>F</sup> *Amphimedon queenslandica* and *Spongilla lacustris* belong to the same subclass Heteroscleromorpha (Class Demospongiae)

**Table S2:** Negative tandem MS of P-16:0/18:1/MMPE

| Chemical Formula        | Exact Mass | Relative abundance (%) | Structure                                                                            |
|-------------------------|------------|------------------------|--------------------------------------------------------------------------------------|
| $[C_{40}H_{77}NO_7P]^-$ | 714.5445   | 24                     | 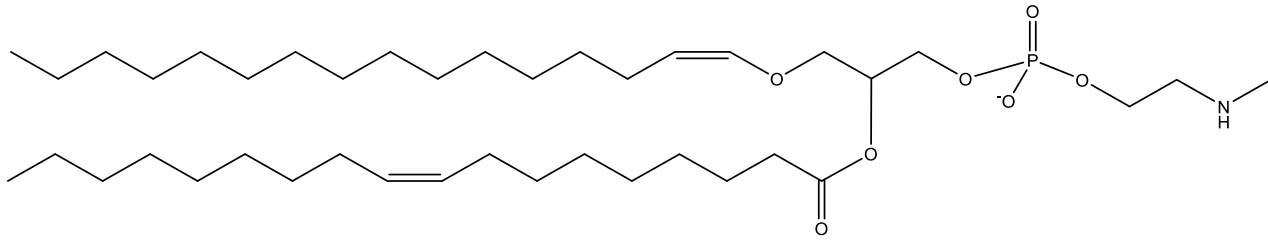   |
| $[C_{24}H_{47}NO_7P]^-$ | 492.3098   | 5                      |    |
| $[C_{24}H_{45}NO_6P]^-$ | 474.2992   | 4                      |   |
| $[C_{22}H_{45}NO_6P]^-$ | 450.2993   | 18                     |  |

|                                                     |          |     |                                                                                    |
|-----------------------------------------------------|----------|-----|------------------------------------------------------------------------------------|
| $[\text{C}_{22}\text{H}_{43}\text{NO}_5\text{P}]^-$ | 432.2886 | 6   | 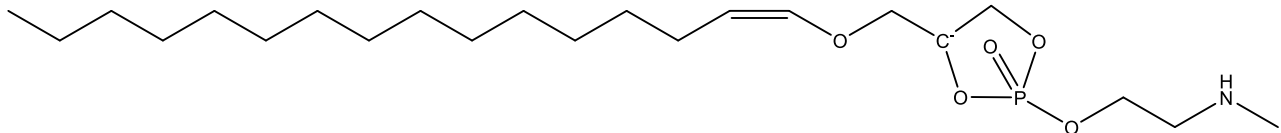 |
| $[\text{C}_{18}\text{H}_{33}\text{O}_2]^-$          | 281.2488 | 100 |  |
| $[\text{C}_6\text{H}_{13}\text{NO}_5\text{P}]^-$    | 210.0539 | 25  |  |

Table S3: Negative tandem MS of P-16:0/18:1/DMPE

5

| Chemical Formula                                    | Exact Mass | Relative abundance (%) | Structure |
|-----------------------------------------------------|------------|------------------------|-----------|
| $[\text{C}_{41}\text{H}_{79}\text{NO}_7\text{P}]^-$ | 728.5602   | 21                     |           |
| $[\text{C}_{25}\text{H}_{49}\text{NO}_7\text{P}]^-$ | 506.3255   | 4                      |           |
| $[\text{C}_{25}\text{H}_{47}\text{NO}_6\text{P}]^-$ | 488.3147   | 4                      |           |
| $[\text{C}_{23}\text{H}_{47}\text{NO}_6\text{P}]^-$ | 464.3148   | 19                     |           |

|                                                     |          |     |                                                                                    |
|-----------------------------------------------------|----------|-----|------------------------------------------------------------------------------------|
| $[\text{C}_{23}\text{H}_{45}\text{NO}_5\text{P}]^-$ | 446.3044 | 5   | 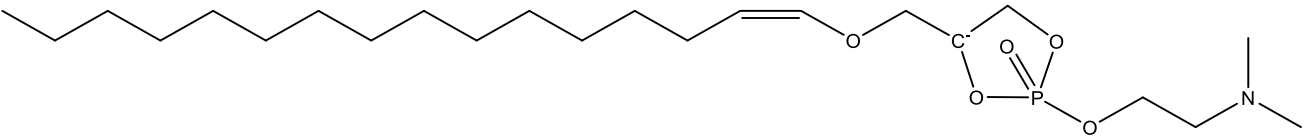 |
| $[\text{C}_{18}\text{H}_{33}\text{O}_2]^-$          | 281.2488 | 100 |  |
| $[\text{C}_7\text{H}_{15}\text{NO}_5\text{P}]^-$    | 224.0694 | 22  |  |

**Table S4:** RP-HPLC of alkenyl-acyl-acetyl glycerols from *Megasphaera cerevisiae*

| plasmeynl | FA <sub>2</sub> | FA <sub>3</sub> | ACN <sup>a</sup> | DB | ECN | % <sup>b</sup> | % <sup>c</sup> | short | tr    | [M+NH <sub>4</sub> ] <sup>+</sup> |
|-----------|-----------------|-----------------|------------------|----|-----|----------------|----------------|-------|-------|-----------------------------------|
| 16:1      | 16:1            | 2:0             | 34               | 2  | 30  | 24.1           | 1.84           | 34:2  | 14.75 | 608.5249                          |
| 14:0      | 16:1            | 2:0             | 32               | 1  | 30  | 8.0            | 0.61           | 32:1  | 17.38 | 582.5092                          |
| 17:1      | 16:1            | 2:0             | 35               | 2  | 31  | 19.2           | 1.46           | 35:2  | 25.47 | 622.5406                          |
| 16:1      | 17:1            | 2:0             | 35               | 2  | 31  | 54.8           | 4.19           | 35:2  | 25.94 | 622.5406                          |
| 14:0      | 17:1            | 2:0             | 33               | 1  | 31  | 19.2           | 1.47           | 33:1  | 28.55 | 596.5249                          |
| 15:0      | 16:1            | 2:0             | 33               | 1  | 31  | 2.7            | 0.21           | 33:1  | 29.32 | 596.5249                          |
| 18:1      | 16:1            | 2:0             | 36               | 2  | 32  | 37.4           | 2.86           | 36:2  | 36.13 | 636.5563                          |
| 16:1      | 18:1            | 2:0             | 36               | 2  | 32  | 20.9           | 1.60           | 36:2  | 36.32 | 636.5563                          |
| 17:1      | 17:1            | 2:0             | 36               | 2  | 32  | 43.9           | 3.35           | 36:2  | 37.13 | 636.5563                          |
| 14:0      | 18:1            | 2:0             | 34               | 1  | 32  | 6.8            | 0.52           | 34:1  | 40.55 | 610.5406                          |
| 16:1      | 16:0            | 2:0             | 34               | 1  | 32  | 30.5           | 2.33           | 34:1  | 42.02 | 610.5406                          |
| 16:0      | 16:1            | 2:0             | 34               | 1  | 32  | 17.0           | 1.30           | 34:1  | 42.32 | 610.5406                          |
| 15:0      | 17:1            | 2:0             | 34               | 1  | 32  | 7.6            | 0.58           | 34:1  | 42.63 | 610.5406                          |
| 14:0      | 16:0            | 2:0             | 32               | 0  | 32  | 10.3           | 0.79           | 32:0  | 43.37 | 584.5249                          |
| 19:1      | 16:1            | 2:0             | 37               | 2  | 33  | 44.6           | 3.40           | 37:2  | 47.29 | 650.5716                          |
| 16:1      | 19:1            | 2:0             | 37               | 2  | 33  | 54.8           | 4.19           | 37:2  | 47.50 | 650.5716                          |
| 18:1      | 17:1            | 2:0             | 37               | 2  | 33  | 84.3           | 6.43           | 37:2  | 48.32 | 650.5716                          |
| 17:1      | 18:1            | 2:0             | 37               | 2  | 33  | 16.6           | 1.27           | 37:2  | 48.41 | 650.5716                          |
| 15:0      | 18:1            | 2:0             | 35               | 1  | 33  | 2.2            | 0.17           | 35:1  | 51.74 | 624.5563                          |
| 14:0      | 19:1            | 2:0             | 35               | 1  | 33  | 19.2           | 1.47           | 35:1  | 52.27 | 624.5563                          |
| 17:1      | 16:0            | 2:0             | 35               | 1  | 33  | 24.3           | 1.85           | 35:1  | 52.73 | 624.5563                          |
| 16:0      | 17:1            | 2:0             | 35               | 1  | 33  | 39.1           | 2.98           | 35:1  | 53.92 | 624.5563                          |
| 15:0      | 16:0            | 2:0             | 33               | 0  | 33  | 3.7            | 0.29           | 33:0  | 54.96 | 598.5406                          |
| 19:1      | 17:1            | 2:0             | 38               | 2  | 34  | 91.0           | 6.95           | 38:2  | 58.51 | 664.5873                          |
| 17:1      | 19:1            | 2:0             | 38               | 2  | 34  | 43.9           | 3.35           | 38:2  | 58.82 | 664.5873                          |
| 18:1      | 18:1            | 2:0             | 38               | 2  | 34  | 32.6           | 2.49           | 38:2  | 59.51 | 664.5873                          |
| 15:0      | 19:1            | 2:0             | 36               | 1  | 34  | 7.6            | 0.58           | 36:1  | 62.10 | 638.5720                          |
| 18:1      | 16:0            | 2:0             | 36               | 1  | 34  | 47.1           | 3.60           | 36:1  | 62.41 | 638.5720                          |
| 18:0      | 16:1            | 2:0             | 36               | 1  | 34  | 4.0            | 0.30           | 36:1  | 62.98 | 638.5720                          |
| 16:1      | 18:0            | 2:0             | 36               | 1  | 34  | 16.7           | 1.28           | 36:1  | 63.27 | 638.5720                          |
| 16:0      | 18:1            | 2:0             | 36               | 1  | 34  | 14.7           | 1.12           | 36:1  | 63.76 | 638.5720                          |
| 16:0      | 16:0            | 2:0             | 34               | 0  | 34  | 21.6           | 1.65           | 34:0  | 64.51 | 612.5563                          |
| 14:0      | 18:0            | 2:0             | 34               | 0  | 34  | 5.3            | 0.40           | 34:0  | 65.57 | 612.5563                          |
| 19:1      | 18:1            | 2:0             | 39               | 2  | 35  | 38.8           | 2.97           | 39:2  | 70.51 | 678.6031                          |
| 18:1      | 19:1            | 2:0             | 39               | 2  | 35  | 84.3           | 6.43           | 39:2  | 70.71 | 678.6031                          |
| 19:1      | 16:0            | 2:0             | 37               | 1  | 35  | 56.0           | 4.28           | 37:1  | 73.91 | 652.5873                          |
| 16:0      | 19:1            | 2:0             | 37               | 1  | 35  | 39.1           | 2.98           | 37:1  | 74.12 | 652.5873                          |
| 17:1      | 18:0            | 2:0             | 37               | 1  | 35  | 13.2           | 1.01           | 37:1  | 74.45 | 652.5873                          |
| 18:0      | 17:1            | 2:0             | 37               | 1  | 35  | 10.3           | 0.79           | 37:1  | 75.16 | 652.5873                          |

|      |      |     |    |   |    |       |      |      |        |          |
|------|------|-----|----|---|----|-------|------|------|--------|----------|
| 15:0 | 18:0 | 2:0 | 35 | 0 | 35 | 1.6   | 0.12 | 35:0 | 77.18  | 626.5720 |
| 19:1 | 19:1 | 2:0 | 40 | 2 | 36 | 100.0 | 7.64 | 40:2 | 81.89  | 692.6187 |
| 18:0 | 18:1 | 2:0 | 38 | 1 | 36 | 13.3  | 0.25 | 38:1 | 84.27  | 666.6030 |
| 18:1 | 18:0 | 2:0 | 38 | 1 | 36 | 26.1  | 2.00 | 38:1 | 85.31  | 666.6030 |
| 18:0 | 16:0 | 2:0 | 36 | 0 | 36 | 5.3   | 0.40 | 36:0 | 88.09  | 640.5877 |
| 16:0 | 18:0 | 2:0 | 36 | 0 | 36 | 11.7  | 0.89 | 36:0 | 88.54  | 640.5877 |
| 19:1 | 18:0 | 2:0 | 39 | 1 | 37 | 31.2  | 2.38 | 39:1 | 96.50  | 680.6187 |
| 18:0 | 19:1 | 2:0 | 39 | 1 | 37 | 10.3  | 0.79 | 39:1 | 96.57  | 680.6187 |
| 18:0 | 18:0 | 2:0 | 38 | 0 | 38 | 2.4   | 0.19 | 38:0 | 105.10 | 668.6187 |

<sup>a</sup> Effective carbon number (ECN), double bond (DB), acyl carbon number (ACN), formula  $ECN = ACN - (2 \times DB)$ , retention time (tR), <sup>b</sup> proportion of base peak (%), <sup>c</sup> proportion of total alkenyl-acyl-acetyl glycerols (%)

**Table S5:** RP-HPLC alkenyl-acyl-acetyl glycerols from *Pectinatus frisingensis*

| plasmeynl | FA <sub>2</sub> | FA <sub>3</sub> | ACN <sup>a</sup> | DB | ECN | % <sup>b</sup> | % <sup>c</sup> | short | tR    | [M+NH <sub>4</sub> ] <sup>+</sup> |
|-----------|-----------------|-----------------|------------------|----|-----|----------------|----------------|-------|-------|-----------------------------------|
| 15:1      | 17:1            | 2:0             | 34               | 2  | 30  | 24.7           | 3.29           | 34:2  | 14.02 | 608.5249                          |
| 15:1      | 15:0            | 2:0             | 32               | 1  | 30  | 4.9            | 0.65           | 32:1  | 18.17 | 582.5092                          |
| 15:1      | 18:1            | 2:0             | 35               | 2  | 31  | 22.9           | 3.06           | 35:2  | 25.11 | 622.5406                          |
| 16:1      | 17:1            | 2:0             | 35               | 2  | 31  | 6.6            | 0.88           | 35:2  | 25.94 | 622.5406                          |
| 14:0      | 17:1            | 2:0             | 33               | 1  | 31  | 11.1           | 1.48           | 33:1  | 28.55 | 596.5249                          |
| 16:1      | 15:0            | 2:0             | 33               | 1  | 31  | 0.8            | 0.11           | 33:1  | 29.06 | 596.5249                          |
| 14:0      | 15:0            | 2:0             | 31               | 0  | 31  | 1.9            | 0.25           | 31:0  | 32.78 | 570.5092                          |
| 16:1      | 18:1            | 2:0             | 36               | 2  | 32  | 6.1            | 0.81           | 36:2  | 36.32 | 636.5563                          |
| 17:1      | 17:1            | 2:0             | 36               | 2  | 32  | 89.2           | 11.90          | 36:2  | 37.13 | 636.5563                          |
| 14:0      | 18:1            | 2:0             | 34               | 1  | 32  | 10.3           | 1.37           | 34:1  | 40.55 | 610.5406                          |
| 15:1      | 17:0            | 2:0             | 34               | 1  | 32  | 9.8            | 1.31           | 34:1  | 41.59 | 610.5406                          |
| 17:1      | 15:0            | 2:0             | 34               | 1  | 32  | 19.2           | 2.56           | 34:1  | 41.80 | 610.5406                          |
| 15:0      | 17:1            | 2:0             | 34               | 1  | 32  | 100.0          | 13.33          | 34:1  | 42.63 | 610.5406                          |
| 15:0      | 15:0            | 2:0             | 32               | 0  | 32  | 21.6           | 2.88           | 32:0  | 43.97 | 584.5249                          |
| 18:1      | 17:1            | 2:0             | 37               | 2  | 33  | 23.6           | 3.14           | 37:2  | 48.32 | 650.5716                          |
| 17:1      | 18:1            | 2:0             | 37               | 2  | 33  | 83.0           | 11.06          | 37:2  | 48.51 | 650.5716                          |
| 15:0      | 18:1            | 2:0             | 35               | 1  | 33  | 93.0           | 12.40          | 35:1  | 51.74 | 624.5563                          |
| 18:1      | 15:0            | 2:0             | 35               | 1  | 33  | 4.6            | 0.62           | 35:1  | 52.79 | 624.5563                          |
| 16:1      | 17:0            | 2:0             | 35               | 1  | 33  | 2.3            | 0.30           | 35:1  | 53.10 | 624.5563                          |
| 16:0      | 17:1            | 2:0             | 35               | 1  | 33  | 11.1           | 1.48           | 35:1  | 53.92 | 624.5563                          |
| 14:0      | 17:0            | 2:0             | 33               | 0  | 33  | 4.2            | 0.56           | 33:0  | 54.67 | 598.5406                          |
| 16:0      | 15:0            | 2:0             | 33               | 0  | 33  | 1.9            | 0.25           | 33:0  | 55.16 | 598.5406                          |
| 18:1      | 18:1            | 2:0             | 38               | 2  | 34  | 21.9           | 2.92           | 38:2  | 59.51 | 664.5873                          |
| 17:1      | 17:0            | 2:0             | 36               | 1  | 34  | 36.7           | 4.90           | 36:1  | 62.71 | 638.5720                          |
| 17:0      | 17:1            | 2:0             | 36               | 1  | 34  | 21.3           | 2.84           | 36:1  | 62.93 | 638.5720                          |
| 16:0      | 18:1            | 2:0             | 36               | 1  | 34  | 10.3           | 1.37           | 36:1  | 63.76 | 638.5720                          |
| 17:0      | 15:0            | 2:0             | 34               | 0  | 34  | 4.1            | 0.55           | 34:0  | 66.15 | 612.5563                          |
| 15:0      | 17:0            | 2:0             | 34               | 0  | 34  | 41.2           | 5.49           | 34:0  | 66.35 | 612.5563                          |

|      |      |     |    |   |    |      |      |      |       |          |
|------|------|-----|----|---|----|------|------|------|-------|----------|
| 17:0 | 18:1 | 2:0 | 37 | 1 | 35 | 19.8 | 2.63 | 37:1 | 74.12 | 652.5873 |
| 18:1 | 17:0 | 2:0 | 37 | 1 | 35 | 9.4  | 1.25 | 37:1 | 74.95 | 652.5873 |
| 18:0 | 17:1 | 2:0 | 37 | 1 | 35 | 8.3  | 1.10 | 37:1 | 75.16 | 652.5873 |
| 18:0 | 15:0 | 2:0 | 35 | 0 | 35 | 1.2  | 0.16 | 35:0 | 76.61 | 626.5720 |
| 16:0 | 17:0 | 2:0 | 35 | 0 | 35 | 4.2  | 0.56 | 35:0 | 77.54 | 626.5720 |
| 18:0 | 18:1 | 2:0 | 38 | 1 | 36 | 7.6  | 1.02 | 38:1 | 84.27 | 666.6030 |
| 17:0 | 17:0 | 2:0 | 36 | 0 | 36 | 8.4  | 1.12 | 36:0 | 88.73 | 640.5877 |
| 18:0 | 17:0 | 2:0 | 37 | 0 | 37 | 3.0  | 0.40 | 37:0 | 99.92 | 654.6030 |

Effective carbon number (ECN), double bond (DB), acyl carbon number (ACN), formula  $ECN = ACN - (2 \times DB)$ , retention time (tR), <sup>b</sup> 12

proportion of base peak (%), <sup>c</sup> proportion of total alkenyl-acyl-acetyl glycerols (%) 13



**Table S6:** Tandem MS alkenyl-acyl-acetyl glycerols

14

| Structure                                                               | P-16:0/18:1/2:0 | P-18:0/18:1/2:0 | P-15:1/17:0/2:0 | P-17:1/15:0/2:0 | P-17:1/17:1/2:0 | P-16:1/18:1/2:0 |
|-------------------------------------------------------------------------|-----------------|-----------------|-----------------|-----------------|-----------------|-----------------|
| Precursor ion $[M+NH_4]^+$                                              | 638.5718        | 666.6031        | 610.5407        | 610.5408        | 636.5563        | 636.5562        |
| Precursor ion $[M+H]^+$                                                 | 621.5452        | 649.5765        | 593.5142        | 593.5144        | 619.5300        | 619.5299        |
| Neutral loss of <i>sn</i> -3 RCOOH + NH <sub>3</sub> from $[M+NH_4]^+$  | 561.5241        | 589.5554        | 533.4936        | 533.4932        | 559.5088        | 559.5087        |
| Neutral loss of <i>sn</i> -2 RCOOH + NH <sub>3</sub> from $[M+NH_4]^+$  | 339.2894        | 367.3207        | 337.2745        | 337.2740        | 337.2740        | 339.2897        |
| <i>sn</i> -2 acyl chain ( $[RC=O +74]^+$ )                              | 339.2894        | 339.2894        | 327.2895        | 299.2583        | 325.2739        | 337.2741        |
| <i>sn</i> -2 acyl chain ( $[RC=O +74]^+$ with loss of H <sub>2</sub> O) | 321.2788        | 321.2788        | 309.2789        | 281.2477        | 307.2633        | 321.2790        |
| <i>sn</i> -2 acyl chain ( $[RC=O]^+$ )                                  | 265.2526        | 265.2526        | 253.2528        | 225.2212        | 251.2371        | 265.2529        |
| <i>sn</i> -2 acyl chain ( $[RC=O]^+$ with loss of H <sub>2</sub> O)     | 247.2420        | 247.2420        | 235.2419        | 207.2110        | 233.2266        | 247.2422        |

15

**Table S7:** Tandem MS of both enantiomers P-16:0/18:1/2:0

| Exact Mass | Relative abundance (%)<br>First enantiomer | Relative abundance (%)<br>Second enantiomer | Structure                                                                                                           |
|------------|--------------------------------------------|---------------------------------------------|---------------------------------------------------------------------------------------------------------------------|
| 638.5720   | 38                                         | 39                                          | Precursor ion $[M+NH_4]^+$                                                                                          |
| 621.5454   | 6                                          | 7                                           | Precursor ion $[M+H]^+$                                                                                             |
| 561.5244   | 100                                        | 100                                         | Neutral loss of <i>sn</i> -3 RCOOH + NH <sub>3</sub> from $[M+NH_4]^+$                                              |
| 339.2896   | 56                                         | 53                                          | <i>sn</i> -2 acyl chain ( $[RC=O+74]^+$ ) or Neutral loss of <i>sn</i> -2 RCOOH + NH <sub>3</sub> from $[M+NH_4]^+$ |
| 321.2790   | 8                                          | 7                                           | <i>sn</i> -2 acyl chain ( $[RC=O+74]^+$ with loss of H <sub>2</sub> O)                                              |
| 265.2528   | 16                                         | 15                                          | <i>sn</i> -2 acyl chain ( $[RC=O]^+$ )                                                                              |
| 247.2422   | 6                                          | 7                                           | <i>sn</i> -2 acyl chain ( $[RC=O]^+$ with loss of H <sub>2</sub> O)                                                 |

## References

1. Vitova, M.; Goecke, F.; Sigler, K.; Rezanka, T. Lipidomic analysis of the extremophilic red alga *Galdieria sulphuraria* in response to changes in pH. *Algal Res. Biomass Biofuels Bioprod.* **2016**, *13*, 218–226, doi:10.1016/j.algal.2015.12.005.
2. Vitova, M.; Bisova, K.; Hlavova, M.; Zachleder, V.; Rucki, M.; Cizkova, M. Glutathione peroxidase activity in the selenium-treated alga *Scenedesmus quadricauda*. *Aquat. Toxicol.* **2011**, *102*, 87–94, doi:10.1016/j.aquatox.2011.01.003.
3. Alves, S.P.; Santos-Silva, J.; Cabrita, A.R.J.; Fonseca, A.J.M.; Bessa, R.J.B. Detailed dimethylacetal and fatty acid composition of rumen content from lambs fed lucerne or concentrate supplemented with Soybean oil. *Plos One* **2013**, *8*, doi:10.1371/journal.pone.0058386.
4. Rezanka, T. Polyunsaturated and unusual fatty acids from slime moulds. *Phytochemistry* **1993**, *33*, 1441–1444, doi:10.1016/0031-9422(93)85106-2.
5. Dembitsky, V.M.; Rezanka, T.; Bychek, I.A. Fatty acids and phospholipids from lichens of the order Lecanorales. *Phytochemistry* **1992**, *31*, 851–853.
6. Farquhar, J.W. Identification and gas-liquid chromatographic behavior of plasmalogen aldehydes and their acetal, alcohol, and acetylated alcohol derivatives. *Journal of Lipid Research* **1962**, *3*, 21–30.
7. Dobson, G.; Itabashi, Y.; Christie, W.W.; Robertson, G.W. Liquid chromatography with particle-beam electron-impact mass spectrometry of diacylglycerol nicotinate. *Chem. Phys. Lipids* **1998**, *97*, 27–39, doi:10.1016/s0009-3084(98)00089-9.
8. Destailats, F.; Angers, P. One-step methodology for the synthesis of FA picolinyl esters from intact lipids. *J. Am. Oil Chem. Soc.* **2002**, *79*, 253–256, doi:10.1007/s11746-002-0469-7.
